# Supplementary material for: Antibacterial Activity and Components of the Methanol-Phase Extract from Rhizomes of Pharmacophagous Plant Alpinia officinarum Hance
Source: MDPI journal article supplement (doi:10.3390/molecules27134308), 2022-07-05
Supplement: s1 [file s1]

## Supplementary materials

**Table S1.** The major altered metabolic pathways in *S. aureus* ATCC8095 induced by the GMPE.

| Metabolic Pathway | Gene ID     | Fold Change | Gene Description                      |
|-------------------|-------------|-------------|---------------------------------------|
| Ribosome          | EQG65_11565 | 2.250       | 30S ribosomal protein S11             |
|                   | EQG65_11570 | 2.398       | 30S ribosomal protein S13             |
|                   | EQG65_11575 | 2.448       | 50S ribosomal protein L36             |
|                   | EQG65_11595 | 2.562       | 50S ribosomal protein L15             |
|                   | EQG65_11555 | 2.681       | 50S ribosomal protein L17             |
|                   | EQG65_08510 | 3.008       | 50S ribosomal protein L27             |
|                   | EQG65_14300 | 3.228       | 50S ribosomal protein L34             |
|                   | EQG65_11650 | 3.257       | 50S ribosomal protein L29             |
|                   | EQG65_02705 | 3.380       | 30S ribosomal protein S7              |
|                   | EQG65_11600 | 3.398       | 50S ribosomal protein L30             |
|                   | EQG65_11610 | 3.444       | 50S ribosomal protein L18             |
|                   | EQG65_02380 | 3.473       | 50S ribosomal protein L25             |
|                   | EQG65_08040 | 3.532       | 50S ribosomal protein L33             |
|                   | EQG65_02695 | 3.550       | 50S ribosomal protein L7-like protein |
|                   | EQG65_11625 | 3.568       | Type Z 30S ribosomal protein S14      |
|                   | EQG65_02700 | 3.579       | 30S ribosomal protein S12             |
|                   | EQG65_11605 | 3.595       | 30S ribosomal protein S5              |
|                   | EQG65_06500 | 3.686       | 30S ribosomal protein S15             |
|                   | EQG65_11630 | 3.720       | 50S ribosomal protein L5              |
|                   | EQG65_11615 | 3.733       | 50S ribosomal protein L6              |
|                   | EQG65_11525 | 3.784       | 30S ribosomal protein S9              |
|                   | EQG65_11635 | 3.805       | 50S ribosomal protein L24             |
|                   | EQG65_11530 | 3.826       | 50S ribosomal protein L13             |
|                   | EQG65_01735 | 3.843       | 30S ribosomal protein S18             |
|                   | EQG65_11640 | 3.939       | 50S ribosomal protein L14             |
|                   | EQG65_11620 | 4.009       | 30S ribosomal protein S8              |
|                   | EQG65_06310 | 4.044       | 30S ribosomal protein S16             |
|                   | EQG65_10975 | 4.178       | Type B 50S ribosomal protein L31      |
|                   | EQG65_01725 | 4.205       | 30S ribosomal protein S6              |
|                   | EQG65_11655 | 4.302       | 50S ribosomal protein L16             |
|                   | EQG65_11670 | 4.304       | 30S ribosomal protein S19             |
|                   | EQG65_11645 | 4.347       | 30S ribosomal protein S17             |
|                   | EQG65_11665 | 4.656       | 50S ribosomal protein L22             |
|                   | EQG65_11660 | 4.665       | 30S ribosomal protein S3              |
|                   | EQG65_02655 | 4.767       | 50S ribosomal protein L11             |
|                   | EQG65_11680 | 4.848       | 50S ribosomal protein L23             |
|                   | EQG65_11675 | 4.930       | 50S ribosomal protein L2              |
|                   | EQG65_06405 | 5.149       | 30S ribosomal protein S2              |
|                   | EQG65_08520 | 5.170       | 50S ribosomal protein L21             |
|                   | EQG65_08215 | 5.198       | 30S ribosomal protein S20             |
|                   | EQG65_06325 | 5.206       | 50S ribosomal protein L19             |
|                   | EQG65_11690 | 5.248       | 50S ribosomal protein L3              |
|                   | EQG65_11685 | 5.264       | 50S ribosomal protein L4              |
|                   | EQG65_02660 | 5.414       | 50S ribosomal protein L1              |

|                                             |             |        |                                                                                           |
|---------------------------------------------|-------------|--------|-------------------------------------------------------------------------------------------|
|                                             | EQG65_11695 | 5.539  | 30S ribosomal protein S10                                                                 |
|                                             | EQG65_02675 | 6.426  | 50S ribosomal protein L7/L12                                                              |
|                                             | EQG65_08665 | 7.772  | 50S ribosomal protein L35                                                                 |
|                                             | EQG65_08890 | 7.936  | 30S ribosomal protein S4                                                                  |
|                                             | EQG65_02670 | 7.942  | 50S ribosomal protein L10                                                                 |
|                                             | EQG65_08660 | 8.055  | 50S ribosomal protein L20                                                                 |
| Purine metabolism                           | EQG65_13860 | 0.024  | Carbamate kinase                                                                          |
|                                             | EQG65_05945 | 0.059  | Carbamate kinase                                                                          |
|                                             | EQG65_13755 | 0.093  | Anaerobic ribonucleoside-triphosphate reductase                                           |
|                                             | EQG65_03735 | 0.359  | Class 1b ribonucleoside-diphosphate reductase subunit $\alpha$                            |
|                                             | EQG65_03740 | 0.472  | Class 1b ribonucleoside-diphosphate reductase subunit $\beta$                             |
|                                             | EQG65_01860 | 2.344  | IMP dehydrogenase                                                                         |
|                                             | EQG65_11585 | 2.413  | Adenylate kinase                                                                          |
|                                             | EQG65_11905 | 2.429  | Urease subunit alpha                                                                      |
|                                             | EQG65_01865 | 2.543  | Glutamine-hydrolyzing GMP synthase                                                        |
|                                             | EQG65_02425 | 3.095  | Hypoxanthine phosphoribosyltransferase                                                    |
|                                             | EQG65_11895 | 3.113  | Urease subunit gamma                                                                      |
|                                             | EQG65_10200 | 3.237  | Adenylosuccinate lyase                                                                    |
|                                             | EQG65_08765 | 3.252  | Pyruvate kinase                                                                           |
|                                             | EQG65_08460 | 3.312  | Adenine phosphoribosyltransferase                                                         |
|                                             | EQG65_11900 | 3.957  | Urease subunit beta                                                                       |
|                                             | EQG65_06890 | 4.976  | GMP reductase                                                                             |
|                                             | EQG65_01850 | 5.085  | Xanthine phosphoribosyltransferase                                                        |
|                                             | EQG65_05375 | 6.772  | 5-(carboxyamino)imidazole ribonucleotide mutase                                           |
|                                             | EQG65_05390 | 7.780  | Phosphoribosylformylglycinamide synthase subunit PurS                                     |
|                                             | EQG65_05380 | 9.637  | 5-(carboxyamino)imidazole ribonucleotide synthase                                         |
|                                             | EQG65_05385 | 10.026 | Phosphoribosylaminoimidazolesuccinocarboxamide synthase                                   |
|                                             | EQG65_05425 | 10.852 | Phosphoribosylamine--glycine ligase                                                       |
|                                             | EQG65_05400 | 13.131 | Phosphoribosylformylglycinamide synthase subunit PurL                                     |
|                                             | EQG65_05420 | 13.262 | Bifunctional phosphoribosylaminoimidazolecarboxamide formyltransferase/IMP cyclohydrolase |
|                                             | EQG65_05415 | 14.297 | Phosphoribosylglycinamide formyltransferase                                               |
|                                             | EQG65_05410 | 15.616 | Phosphoribosylformylglycinamide cyclo-ligase                                              |
|                                             | EQG65_00095 | 16.494 | Adenylosuccinate synthase                                                                 |
| Alanine, aspartate and glutamate metabolism | EQG65_13415 | 0.070  | L-glutamate gamma-semialdehyde dehydrogenase                                              |
|                                             | EQG65_04810 | 0.150  | NAD-specific glutamate dehydrogenase                                                      |
|                                             | EQG65_11150 | 0.172  | Glutamine--fructose-6-phosphate transaminase (isomerizing)                                |
|                                             | EQG65_08830 | 0.220  | Alanine dehydrogenase                                                                     |
|                                             | EQG65_07440 | 0.463  | Alanine dehydrogenase                                                                     |
|                                             | EQG65_06680 | 2.208  | Type I glutamate--ammonia ligase                                                          |
|                                             | EQG65_02190 | 5.136  | Glutamate synthase subunit $\beta$                                                        |
|                                             | EQG65_02185 | 5.608  | Glutamate synthase large subunit                                                          |
|                                             | EQG65_07660 | 5.839  | Asparaginase                                                                              |
|                                             | EQG65_05395 | 13.761 | Phosphoribosylformylglycinamide synthase subunit PurQ                                     |
|                                             | EQG65_05405 | 14.775 | Amidophosphoribosyltransferase                                                            |
| Pyrimidine metabolism                       | EQG65_06130 | 15.489 | Carbamoyl-phosphate synthetase large subunit                                              |
|                                             | EQG65_06125 | 19.069 | Carbamoyl-phosphate synthetase small subunit                                              |
|                                             | EQG65_01440 | 0.028  | Pseudouridine-5'-phosphate glycosidase                                                    |

|                         |                    |        |                                                                                            |
|-------------------------|--------------------|--------|--------------------------------------------------------------------------------------------|
|                         | <i>EQG65_11055</i> | 0.137  | Pyrimidine-nucleoside phosphorylase                                                        |
|                         | <i>EQG65_06420</i> | 2.255  | UMP kinase                                                                                 |
|                         | <i>EQG65_07655</i> | 2.508  | (d)CMP kinase                                                                              |
|                         | <i>EQG65_02760</i> | 2.707  | Deoxynucleoside kinase                                                                     |
|                         | <i>EQG65_08335</i> | 3.362  | Uridine kinase                                                                             |
|                         | <i>EQG65_10965</i> | 3.370  | Thymidine kinase                                                                           |
|                         | <i>EQG65_13595</i> | 4.843  | Quinone-dependent dihydroorotate dehydrogenase                                             |
|                         | <i>EQG65_11010</i> | 5.962  | CTP synthase                                                                               |
|                         | <i>EQG65_06105</i> | 8.209  | Bifunctional pyr operon transcriptional regulator/uracil<br>phosphoribosyltransferase PyrR |
|                         | <i>EQG65_06140</i> | 12.374 | Orotate phosphoribosyltransferase                                                          |
|                         | <i>EQG65_06135</i> | 12.955 | Orotidine-5'-phosphate decarboxylase                                                       |
|                         | <i>EQG65_06120</i> | 22.780 | Dihydroorotase                                                                             |
|                         | <i>EQG65_06115</i> | 30.276 | Aspartate carbamoyltransferase                                                             |
| Fatty acid biosynthesis | <i>EQG65_00950</i> | 0.073  | Long-chain fatty acid--CoA ligase                                                          |
|                         | <i>EQG65_08315</i> | 0.457  | Acetyl-CoA carboxylase biotin carboxyl carrier protein<br>subunit                          |
|                         | <i>EQG65_07920</i> | 2.312  | Acetyl-CoA carboxylase biotin carboxyl carrier protein                                     |
|                         | <i>EQG65_06270</i> | 2.520  | 3-oxoacyl-[acyl-carrier-protein] reductase                                                 |
|                         | <i>EQG65_06265</i> | 2.705  | [acyl-carrier-protein] S-malonyltransferase                                                |
|                         | <i>EQG65_07915</i> | 2.771  | Acetyl-CoA carboxylase biotin carboxylase subunit                                          |
|                         | <i>EQG65_06540</i> | 2.847  | SDR family NAD(P)-dependent oxidoreductase                                                 |
|                         | <i>EQG65_04940</i> | 3.089  | Beta-ketoacyl-[acyl-carrier-protein] synthase II                                           |
|                         | <i>EQG65_08780</i> | 4.037  | Acetyl-CoA carboxylase carboxyltransferase subunit beta                                    |
|                         | <i>EQG65_08775</i> | 4.062  | Acetyl-CoA carboxylase carboxyltransferase subunit alpha                                   |
|                         | <i>EQG65_04935</i> | 5.502  | Ketoacyl-ACP synthase III                                                                  |
| Protein export          | <i>EQG65_13950</i> | 0.423  | Accessory Sec system translocase SecA2                                                     |
|                         | <i>EQG65_06305</i> | 2.006  | Signal recognition particle protein                                                        |
|                         | <i>EQG65_13970</i> | 2.085  | Accessory Sec system protein translocase subunit SecY2                                     |
|                         | <i>EQG65_01625</i> | 2.284  | Twin-arginine translocase TatA/TatE family subunit                                         |
|                         | <i>EQG65_11590</i> | 2.326  | Preprotein translocase subunit SecY                                                        |
|                         | <i>EQG65_01620</i> | 2.561  | Twin-arginine translocase subunit TatC                                                     |
|                         | <i>EQG65_10815</i> | 2.579  | Membrane protein insertase YidC                                                            |
|                         | <i>EQG65_03855</i> | 2.590  | Preprotein translocase subunit SecA                                                        |
|                         | <i>EQG65_04850</i> | 3.062  | Signal peptidase IB                                                                        |
|                         | <i>EQG65_08470</i> | 3.388  | Protein translocase subunit SecDF                                                          |
|                         | <i>EQG65_06095</i> | 3.405  | Lipoprotein signal peptidase                                                               |
|                         | <i>EQG65_04845</i> | 3.472  | Signal peptidase I                                                                         |
| Carotenoid biosynthesis | <i>EQG65_13470</i> | 0.103  | Glycosyl-4%2C4'-diaponeurosporenoate acyltransferase                                       |
|                         | <i>EQG65_13465</i> | 0.125  | Diapolycopene oxygenase                                                                    |
|                         | <i>EQG65_13460</i> | 0.212  | 4%2C4'-diaponeurosporenoate glycosyltransferase                                            |
|                         | <i>EQG65_13450</i> | 0.232  | Dehydrosqualene desaturase                                                                 |
|                         | <i>EQG65_13455</i> | 0.312  | Dehydrosqualene synthase                                                                   |
| Arginine biosynthesis   | <i>EQG65_13875</i> | 0.014  | Arginine deiminase                                                                         |
|                         | <i>EQG65_13870</i> | 0.015  | Ornithine carbamoyl transferase                                                            |
|                         | <i>EQG65_05940</i> | 0.042  | Ornithine carbamoyl transferase                                                            |
|                         | <i>EQG65_11195</i> | 0.094  | Arginase                                                                                   |
| Aminoacyl-tRNA          | <i>EQG65_08945</i> | 2.034  | Tyrosine--tRNA ligase                                                                      |

|                                             |                    |        |                                                             |
|---------------------------------------------|--------------------|--------|-------------------------------------------------------------|
| biosynthesis                                | <i>EQG65_02465</i> | 2.052  | Lysine--tRNA ligase                                         |
|                                             | <i>EQG65_08435</i> | 2.232  | Aspartate--tRNA ligase                                      |
|                                             | <i>EQG65_09115</i> | 2.439  | Leucine--tRNA ligase                                        |
|                                             | <i>EQG65_06195</i> | 2.777  | Methionyl-tRNA formyltransferase                            |
|                                             | <i>EQG65_08575</i> | 2.796  | Valine--tRNA ligase                                         |
|                                             | <i>EQG65_08440</i> | 2.823  | Histidine--tRNA ligase                                      |
|                                             | <i>EQG65_08110</i> | 2.953  | Glycine--tRNA ligase                                        |
|                                             | <i>EQG65_06445</i> | 3.241  | Proline--tRNA ligase                                        |
|                                             | <i>EQG65_05770</i> | 3.281  | Phenylalanine--tRNA ligase subunit beta                     |
|                                             | <i>EQG65_10165</i> | 4.021  | Asp-tRNA (Asn)/Glu-tRNA (Gln) amidotransferase subunit GatC |
|                                             | <i>EQG65_05765</i> | 4.057  | Phenylalanine--tRNA ligase subunit alpha                    |
|                                             | <i>EQG65_10155</i> | 4.146  | Asp-tRNA (Asn)/Glu-tRNA (Gln) amidotransferase subunit GatB |
|                                             | <i>EQG65_10160</i> | 4.280  | Asp-tRNA (Asn)/Glu-tRNA (Gln) amidotransferase subunit GatA |
|                                             | <i>EQG65_06075</i> | 4.401  | Isoleucine--tRNA ligase                                     |
| Carbon fixation in photosynthetic organisms | <i>EQG65_08705</i> | 0.013  | Type I glyceraldehyde-3-phosphate dehydrogenase             |
|                                             | <i>EQG65_09275</i> | 0.032  | Phosphoenolpyruvate carboxykinase (ATP)                     |
|                                             | <i>EQG65_13195</i> | 0.134  | Fructose-1%2C6-bisphosphatase                               |
|                                             | <i>EQG65_06920</i> | 2.036  | Transketolase                                               |
|                                             | <i>EQG65_03980</i> | 3.277  | Triose-phosphate isomerase                                  |
|                                             | <i>EQG65_03975</i> | 3.496  | Phosphoglycerate kinase                                     |
|                                             | <i>EQG65_03970</i> | 3.781  | Type I glyceraldehyde-3-phosphate dehydrogenase             |
| PTS                                         | <i>EQG65_11000</i> | 3.929  | Fructose-bisphosphate aldolase                              |
|                                             | <i>EQG65_01540</i> | 0.021  | PTS sugar transporter subunit IIA                           |
|                                             | <i>EQG65_01530</i> | 0.056  | PTS ascorbate transporter subunit IIC                       |
|                                             | <i>EQG65_01025</i> | 0.084  | PTS sugar transporter subunit IIA                           |
|                                             | <i>EQG65_01535</i> | 0.106  | PTS sugar transporter subunit IIB                           |
|                                             | <i>EQG65_01035</i> | 0.143  | PTS galactitol transporter subunit IIC                      |
|                                             | <i>EQG65_01030</i> | 0.195  | PTS galactitol transporter subunit IIB                      |
|                                             | <i>EQG65_13910</i> | 0.430  | PTS mannose transporter subunit IIABC                       |
|                                             | <i>EQG65_03560</i> | 24.254 | PTS fructose transporter subunit IIC                        |
|                                             | <i>EQG65_03555</i> | 28.586 | 1-phosphofructokinase                                       |

**Table S2.** The major altered metabolic pathways in *E. sakazakii* CMCC45401 mediated by the GMPE.

| Metabolic Pathway               | Gene ID     | Fold Change | Gene Description                                              |
|---------------------------------|-------------|-------------|---------------------------------------------------------------|
| Tryptophan metabolism           | AFK63_10145 | 2.043       | Hydroperoxidase                                               |
|                                 | AFK63_04175 | 2.046       | Indolepyruvate decarboxylase                                  |
|                                 | AFK63_02085 | 3.317       | Peroxidase                                                    |
| ABC transporters                | AFK63_15425 | 0.163       | Capsule biosynthesis protein                                  |
|                                 | AFK63_07285 | 0.204       | Nitrate/bicarbonate ABC transporter substrate-binding protein |
|                                 | AFK63_12140 | 0.224       | Glutamine ABC transporter substrate-binding protein           |
|                                 | AFK63_12150 | 0.237       | Glutamine ABC transporter ATP-binding protein                 |
|                                 | AFK63_12145 | 0.255       | Glutamine ABC transporter permease                            |
|                                 | AFK63_04315 | 0.295       | Heme ABC transporter permease                                 |
|                                 | AFK63_04505 | 0.315       | Amino acid ABC transporter permease                           |
|                                 | AFK63_12390 | 0.349       | Molybdenum ABC transporter ATP-binding protein                |
|                                 | AFK63_04500 | 0.360       | Amino acid ABC transporter permease                           |
|                                 | AFK63_04490 | 0.381       | Histidine ABC transporter substrate-binding protein HisJ      |
|                                 | AFK63_16815 | 0.400       | Amino acid ABC transporter permease                           |
|                                 | AFK63_16810 | 0.408       | Amino acid ABC transporter substrate-binding protein          |
|                                 | AFK63_15090 | 0.415       | Thiamine ABC transporter substrate-binding protein            |
|                                 | AFK63_16820 | 0.433       | Amino acid ABC transporter permease                           |
|                                 | AFK63_04495 | 0.435       | Histidine ABC transporter substrate-binding protein HisJ      |
|                                 | AFK63_12970 | 1.779       | ABC transporter                                               |
|                                 | AFK63_19755 | 1.789       | Leucine ABC transporter substrate-binding protein             |
|                                 | AFK63_00740 | 1.799       | Maltose transporter                                           |
|                                 | AFK63_11885 | 1.821       | Putrescine transporter ATP-binding subunit                    |
|                                 | AFK63_01455 | 1.824       | Sugar ABC transporter ATP-binding protein                     |
|                                 | AFK63_08460 | 1.829       | Choline ABC transporter permease                              |
|                                 | AFK63_18595 | 1.845       | Sugar ABC transporter ATP-binding protein                     |
|                                 | AFK63_18600 | 1.868       | Ribose ABC transporter permease                               |
|                                 | AFK63_18485 | 2.015       | Phosphate ABC transporter substrate-binding protein           |
|                                 | AFK63_01450 | 2.177       | Sugar ABC transporter substrate-binding protein               |
|                                 | AFK63_12985 | 2.187       | ABC transporter substrate-binding protein                     |
|                                 | AFK63_00745 | 2.458       | Sugar ABC transporter substrate-binding protein               |
|                                 | AFK63_19775 | 2.551       | Leucine/isoleucine/valine transporter permease subunit        |
|                                 | AFK63_19780 | 2.573       | Leucine/isoleucine/valine transporter ATP-binding subunit     |
|                                 | AFK63_19785 | 2.765       | Leucine/isoleucine/valine transporter ATP-binding subunit     |
|                                 | AFK63_19770 | 3.149       | Branched-chain amino acid transporter permease subunit LivH   |
|                                 | AFK63_19280 | 3.162       | Xylose transporter                                            |
|                                 | AFK63_06125 | 3.497       | Sugar ABC transporter substrate-binding protein               |
|                                 | AFK63_00750 | 3.726       | Maltose/maltodextrin transporter ATP-binding protein          |
|                                 | AFK63_06130 | 3.765       | L-arabinose transporter ATP-binding protein                   |
|                                 | AFK63_19285 | 3.994       | D-xylose transporter subunit XylF                             |
| Fructose and mannose metabolism | AFK63_06860 | 1.769       | PTS mannose transporter subunit IIAB                          |
|                                 | AFK63_05265 | 1.816       | Fructose-bisphosphate aldolase                                |
|                                 | AFK63_08160 | 2.291       | Mannose-6-phosphate isomerase                                 |
|                                 | AFK63_05020 | 2.405       | 1-phosphofructokinase                                         |
|                                 | AFK63_19290 | 4.281       | Xylose isomerase                                              |
|                                 | AFK63_05425 | 6.011       | Phosphomannomutase                                            |
|                                 | AFK63_05405 | 8.932       | GDP-fucose synthetase                                         |

|                                |             |        |                                                            |
|--------------------------------|-------------|--------|------------------------------------------------------------|
|                                | AFK63_05400 | 9.129  | GDP-mannose 4%2C6-dehydratase                              |
|                                | AFK63_05420 | 13.341 | Mannose-1-phosphate guanyltransferase                      |
| Fatty acid degradation         | AFK63_06955 | 1.935  | Long-chain fatty acid--CoA ligase                          |
|                                | AFK63_17080 | 2.113  | 3-ketoacyl-CoA thiolase                                    |
|                                | AFK63_14360 | 2.388  | Acyl-CoA dehydrogenase                                     |
|                                | AFK63_17075 | 2.668  | Multifunctional fatty acid oxidation complex subunit alpha |
|                                | AFK63_08175 | 5.512  | Alcohol dehydrogenase                                      |
| Butanoate metabolism           | AFK63_08680 | 0.305  | Succinate dehydrogenase                                    |
|                                | AFK63_12550 | 1.959  | Succinate dehydrogenase                                    |
|                                | AFK63_12555 | 2.020  | Succinate dehydrogenase                                    |
|                                | AFK63_08185 | 2.029  | Pyruvate-flavodoxin oxidoreductase                         |
|                                | AFK63_08940 | 2.209  | 3-oxoacyl-ACP reductase                                    |
|                                | AFK63_07645 | 3.368  | Formate acetyltransferase                                  |
| Glycosphingolipid biosynthesis | AFK63_17760 | 2.158  | $\alpha$ -galactosidase                                    |
|                                | AFK63_12700 | 2.290  | $\beta$ -N-acetylhexosaminidase                            |
| Starch and sucrose metabolism  | AFK63_06140 | 1.901  | Trehalose phosphatase                                      |
|                                | AFK63_19875 | 1.921  | Glycogen branching protein                                 |
|                                | AFK63_13750 | 2.059  | Maltodextrin glucosidase                                   |
|                                | AFK63_19935 | 2.077  | Maltose phosphorylase                                      |
|                                | AFK63_06145 | 2.258  | Trehalose-6-phosphate synthase                             |
|                                | AFK63_08030 | 2.335  | $\beta$ -phosphoglucomutase                                |
|                                | AFK63_01700 | 2.383  | PTS cellobiose transporter subunit IIC                     |
|                                | AFK63_09960 | 2.699  | $\beta$ -D-glucoside glucohydrolase                        |
|                                | AFK63_19260 | 3.972  | $\alpha$ -amylase                                          |
|                                | AFK63_01705 | 4.086  | PTS lactose transporter subunit IIB                        |
|                                | AFK63_15600 | 4.313  | PTS cellobiose transporter subunit IIC                     |
|                                | AFK63_02320 | 7.040  | 6-phospho-beta-glucosidase                                 |
| Lysine degradation             | AFK63_16040 | 1.807  | Putrescine--2-oxoglutarate aminotransferase                |
|                                | AFK63_12535 | 1.900  | Dihydrolipoamide succinyltransferase                       |
|                                | AFK63_16660 | 2.441  | Succinate-semialdehyde dehydrogenase                       |
| Other glycan degradation       | AFK63_14170 | 2.011  | $\beta$ -D-galactosidase                                   |
| Benzoate degradation           | AFK63_08975 | 2.202  | Tautomerase PptA                                           |

**Table S3.** Bacterial strains and media used in this study.

| Bacterial strain                                                                                                                         | Culture medium | Source              |
|------------------------------------------------------------------------------------------------------------------------------------------|----------------|---------------------|
| <i>Aeromonas hydrophila</i>                                                                                                              | TSB            | LS-SHOU, China      |
| <i>Aeromonas hydrophila</i> ATCC35654                                                                                                    | TSB            | ATCC, United States |
| <i>Enterobacter cloacae</i> ATCC13047                                                                                                    | TSB            | Biobw, China        |
| <i>Enterobacter cloacae</i>                                                                                                              | LB             | LS-SHOU, China      |
| <i>Enterobacter sakazakii</i> CMCC45401                                                                                                  | TSB            | Biobw, China        |
| <i>Escherichia coli</i> ATCC8739                                                                                                         | TSB            | Biobw, China        |
| <i>Escherichia coli</i> K12                                                                                                              | TSB            | IIM, China          |
| <i>Escherichia coli</i> ATCC25922                                                                                                        | LB             | ATCC, United States |
| <i>Listeria monocytogenes</i> ATCC19115                                                                                                  | BHI            | Biobw, China        |
| <i>Pseudomonas aeruginosa</i> ATCC9027                                                                                                   | TSB            | Biobw, China        |
| <i>Pseudomonas aeruginosa</i> ATCC27853                                                                                                  | TSB            | Biobw, China        |
| <i>Salmonella enterica</i> subsp. <i>enterica</i> (ex<br>Kauffmann and Edwards) Le Minor<br>and Popoff serovar Choleraesuis<br>ATCC13312 | TSB            | ATCC, United States |
| <i>Salmonella enterica</i> subsp. <i>enterica</i> (ex<br>Kauffmann and Edwards) Le Minor<br>and Popoff serovar Vellore ATCC15611         | TSB            | ATCC, United States |
| <i>Salmonella paratyphi</i> -A CMCC50093                                                                                                 | TSB            | GCCC, China         |
| <i>Shigella dysenteriae</i> CMCC51252                                                                                                    | TSB            | GCCC, China         |
| <i>Shigella flexneri</i> CMCC51572                                                                                                       | TSB            | GCCC, China         |
| <i>Shigella flexneri</i> ATCC12022                                                                                                       | TSB            | ATCC, United States |
| <i>Shigella flexneri</i> CMCC51574                                                                                                       | TSB            | GCCC, China         |
| <i>Shigella sonnei</i> ATCC25931                                                                                                         | TSB            | ATCC, United States |
| <i>Shigella sonnei</i> CMCC51592                                                                                                         | TSB            | GCCC, China         |
| <i>Staphylococcus aureus</i> GIM1.160                                                                                                    | TSB            | GCCC, China         |
| <i>Staphylococcus aureus</i> ATCC25923                                                                                                   | TSB            | ATCC, United States |
| <i>Staphylococcus aureus</i> ATCC8095                                                                                                    | TSB            | ATCC, United States |
| <i>Staphylococcus aureus</i> ATCC29213                                                                                                   | TSB            | ATCC, United States |
| <i>Staphylococcus aureus</i> ATCC6538                                                                                                    | TSB            | ATCC, United States |
| <i>Staphylococcus aureus</i> GIM1.441                                                                                                    | TSB            | LS-SHOU, China      |
| <i>Vibrio alginolyticus</i>                                                                                                              | TSB            | LS-SHOU, China      |
| <i>Vibrio alginolyticus</i> ATCC17749                                                                                                    | TSB            | ATCC, United States |
| <i>Vibrio alginolyticus</i> ATCC33787                                                                                                    | TSB            | ATCC, United States |
| <i>Vibrio fluvialis</i> ATCC33809                                                                                                        | Marine 2216    | ATCC, United States |
| <i>Vibrio harvey</i> ATCC BAA-1117                                                                                                       | Marine 2216    | ATCC, United States |
| <i>Vibrio harveyi</i> ATCC33842                                                                                                          | Marine 2216    | ATCC, United States |
| <i>Vibrio metschnikovii</i> ATCC700040                                                                                                   | Marine 2216    | ATCC, United States |
| <i>Vibrio mimicus</i> bio-56759                                                                                                          | TSB            | Biobw, China        |
| <i>Vibrio parahaemolyticus</i> ATCC17802                                                                                                 | TSB            | ATCC, United States |
| <i>Vibrio parahaemolyticus</i> B3-13                                                                                                     | TSB            | LS-SHOU, China      |
| <i>Vibrio parahaemolyticus</i> B4-10                                                                                                     | TSB            | LS-SHOU, China      |
| <i>Vibrio parahaemolyticus</i> B5-29                                                                                                     | TSB            | LS-SHOU, China      |
| <i>Vibrio parahaemolyticus</i> B9-35                                                                                                     | TSB            | LS-SHOU, China      |
| <i>Vibrio vulnificus</i> ATCC27562                                                                                                       | TSB            | Biobw, China        |
| <i>Vibrio vulnificus</i>                                                                                                                 | TSB            | LS-SHOU, China      |

ATCC: American Type Culture Collection, United States; GCCC, Guangdong Culture Collection Center, Guangzhou, China; IIM, Institute of Industrial Microbiology, Shanghai, China; LS-SHOU, Laboratory stock, Shanghai Ocean University, Shanghai, China.
